# Supplementary material for: Inventors emerging in-school and out-of-school: six iterations of educational design to promote equitable student engagement
Source: Frontiers journal article supplement (doi:10.3389/feduc.2024.1287521), 2024-02-13
Supplement: Data_Sheet_1.ZIP [file Data_Sheet_1.ZIP]

| 2018 FVC Schedule               |                                                                                                                                                                                                                                           |                                                                                                                                                                                                                |                                                                                                                                                                                                                                         |                                                                                                                                                                                                                                         |                                                                                                                      | Notes |
|---------------------------------|-------------------------------------------------------------------------------------------------------------------------------------------------------------------------------------------------------------------------------------------|----------------------------------------------------------------------------------------------------------------------------------------------------------------------------------------------------------------|-----------------------------------------------------------------------------------------------------------------------------------------------------------------------------------------------------------------------------------------|-----------------------------------------------------------------------------------------------------------------------------------------------------------------------------------------------------------------------------------------|----------------------------------------------------------------------------------------------------------------------|-------|
| white =<br>general,<br>minds-on | gray = general, hands-on                                                                                                                                                                                                                  | yellow = topical, minds-on                                                                                                                                                                                     | orange = topical, hands-on                                                                                                                                                                                                              | light-blue = independent,<br>minds-on                                                                                                                                                                                                   | medium-blue =<br>independent, hands-on                                                                               |       |
|                                 | Monday, Feb. 19                                                                                                                                                                                                                           | Tuesday, Feb. 20                                                                                                                                                                                               | Wednesday, Feb. 21                                                                                                                                                                                                                      | Thursday, Feb. 22                                                                                                                                                                                                                       | Friday, Feb. 23                                                                                                      |       |
| 9:00-<br>9:30 AM                | <u>Dr. E.</u> : Invention problem strip activity [2]                                                                                                                                                                                      | <u>Mr. C.</u> : Review safety practices.                                                                                                                                                                       | <u>Mr. C.</u> : Review invention & safety practices.                                                                                                                                                                                    | <u>Mr. C.</u> : Review invention & safety practices.                                                                                                                                                                                    | <u>Mr. C.</u> : Review invention & safety practices / <u>Sci.Lit.</u> : Lesson on brochures                          |       |
| 9:30-<br>10:00 AM               | <u>Dr. E.</u> : Introductions & "What's your fave invention?"<br>Student-defined "invention."<br>--> <b>synthesize to "useful and unique"</b><br>Hand-out guides & introduce the week's activities [P10-P11]                              | <u>Mr. P.</u> : Inventing is a team sport. Four Corners to aid in team selection [7]                                                                                                                           | <u>Dr. Z.+Mr. K.</u> : Introduction to the Diddley Bow [41-42] / <u>Sci.Lit.</u> : Review procedure writing [43-46]                                                                                                                     | <u>Mr. C.</u> : Meet Jay Silver [47]                                                                                                                                                                                                    | <u>Dr. E.+Mr. P.</u> : Invention Challenge: Make second prototype [ITERATION C2]                                     |       |
| 10:00-<br>10:30 AM              | <u>Mr. C.</u> : Safety first! [13]<br>Rules posted.<br>Keep yourself safe.<br>Keep others safe.<br>Keep workspace clutterfree.                                                                                                            | <u>Mr. J.</u> : Review how speakers work [22-23] / <u>Lit.</u> : language and genre component of procedure writing [24-27]                                                                                     | <u>Dr. Z.+Mr. S.</u> : Invent an Electric Instrument, pt. 1 [42-43]: Set criteria, constraints, and type of instrument.                                                                                                                 | <u>Mr. S.</u> : Invent an Electric Instrument, pt. 3.1: Attach the pickup to an instrument [ITERATION E1]                                                                                                                               | <u>Dr. E.+Mr. P.</u> : Peer-review of Invention Challenges [ITERATION C2]                                            |       |
| 10:30-<br>10:40 AM              | Break                                                                                                                                                                                                                                     | Break                                                                                                                                                                                                          | Break                                                                                                                                                                                                                                   | Break                                                                                                                                                                                                                                   | Break                                                                                                                |       |
| 10:40-<br>11:00 AM              | <u>Dr. E.</u> : Design a cell phone stand. [3-4.25]<br>Draw first.<br>Make your stand.                                                                                                                                                    | <u>Mr. P.</u> : Build speakers: Iteration 1 [24-27]                                                                                                                                                            | <u>Mr. S.</u> : Invent an Electric Instrument, pt. 2: Make a Pickup [43-46]                                                                                                                                                             | <u>Mr. J.+Mr. S.</u> : Peer-review of instruments ITERATION E1                                                                                                                                                                          | <u>ALL</u> : Prepare for showcase: Revise brochures, finalize prototypes, complete Invention Worksheets, film videos |       |
| 11:00-<br>11:30 AM              | <u>Dr. E.</u> : Think about your stand. Share design / process. Did you get someone else's opinion? What would you do the same or differently?                                                                                            | <u>Mr. P.</u> : Peer-review of speakers. [29-30]                                                                                                                                                               |                                                                                                                                                                                                                                         | <u>Mr. J.+Mr. S.</u> : Invent an Electric Instrument, pt. 3.2: Attach the pickup to an instrument [ITERATION E2]                                                                                                                        |                                                                                                                      |       |
| 11:30 AM-<br>Noon               | <u>Mr. J.</u> : Intro to Sound: Round-Robin [11-12]                                                                                                                                                                                       | <u>Mr. P.</u> : Build speakers: Iteration 2                                                                                                                                                                    | <u>Dr. Z.</u> : Intro to Invention Chall. [49] ( <i>curious, empathetic leaders</i> )                                                                                                                                                   | <u>Mr. J.+Mr. S.</u> : Peer-review of instruments ITERATION E2                                                                                                                                                                          |                                                                                                                      |       |
| Noon-<br>12:30 PM               | Lunch                                                                                                                                                                                                                                     | Lunch                                                                                                                                                                                                          | Lunch                                                                                                                                                                                                                                   | Lunch                                                                                                                                                                                                                                   | Lunch                                                                                                                |       |
| 12:30-<br>1:00 PM               | <u>Mr. C.</u> : Dissect earbuds* [13-14] * <i>Need hammers &amp; boards (NOT in kit)</i>                                                                                                                                                  | <u>Mr. S.</u> : Make a Musical Instrument: Iteration 1 [38-40]                                                                                                                                                 | <u>Dr. Z.</u> : Explore team members' 10 ideas (30-40 / group) [52-53] Pick top 3-5 problems by clumping similar problems and discarding problems that may be less beneficial.                                                          | <u>Ms. M.</u> : Invention Challenge: Make first prototype [ITERATION C1] / <u>Sci.Lit.</u> : Rough Draft of Electric instrument brochure                                                                                                | <u>Dr. E.</u> : Showcase of Winter Camp with special guests (LMIT, BC, Clarks, parents) Presentation of certificates |       |
| 1:00-<br>1:30 PM                | <u>Mr. J.</u> : Intro to speakers & electromagnetism [14-15] / <u>Sci.Lit.</u> : intro to procedure writing                                                                                                                               | <u>Mr. P.</u> : Peer-review of Musical instruments                                                                                                                                                             | <u>Dr. Z.</u> : Select 1 Problem & draw multiple solutions; use readily available materials to make models (grab bag inventing, cardboard, recycle bin); SCAMPER [53-54,57]                                                             |                                                                                                                                                                                                                                         |                                                                                                                      |       |
| 1:30-<br>2:00 PM                | <u>Mr. S.</u> : Build an electromagnet [16-20] / general overflow time                                                                                                                                                                    | <u>Mr. S.</u> : Make a Musical Instrument: Iteration 2                                                                                                                                                         | <u>Dr. Z.</u> : Complete Invention Worksheet for one problem. Continue to research and draw possible solutions. [54,58]                                                                                                                 | <u>Ms. M.</u> : Peer-review of Invention Challenges [ITERATION C1]                                                                                                                                                                      |                                                                                                                      |       |
| 2:00-<br>2:30 PM                |                                                                                                                                                                                                                                           | <u>LC</u> : Introduce empathy. How does empathy relate to invention? How are you empathetic?                                                                                                                   | <u>AH</u> : Skype with Drew (drummer & inventor)                                                                                                                                                                                        | <u>OH</u> : Skype with a professional inventor (TBD).                                                                                                                                                                                   | <u>Dr. K.+Ms. K.</u> : Reflection and feedback                                                                       |       |
| 2:30-<br>3:00 PM                | <u>Mr. J.</u> : Summarize the day, go over key terms, preview tomorrow, then assign "10 ideas" HW (be <i>curious</i> to brainstorm about noise/sound/music); ask, "What'd you do today?" Complete Exit Slips (self-assessment + mini-CER) | <u>Mr. P.</u> : Summarize the day, go over key terms, preview tomorrow, re-frame "10 ideas" HW. (be <i>empathetic</i> to brainstorm about noise/sound/music.); ask, "What'd you do today?" Complete Exit Slips | <u>Dr. Z.</u> : Summarize the day, go over key terms, preview tomorrow, emphasize "one idea" *and* musical instrument as HW (discuss them with family/friends, and/or bring materials); ask, "What'd you do today?" Complete Exit Slips | <u>Dr. K.</u> : Summarize the day, go over key terms, preview tomorrow, emphasize "one idea" *and* musical instrument as HW (discuss them with family/friends, and/or bring materials); ask, "What'd you do today?" Complete Exit Slips | <u>Dr. K.+Ms. K.</u> : Exit Slips Interviews                                                                         |       |
| Extra material                  | Types of Team Members                                                                                                                                                                                                                     | Intro to Larynx                                                                                                                                                                                                |                                                                                                                                                                                                                                         | ¿Meet Jay Silver?                                                                                                                                                                                                                       |                                                                                                                      |       |
| Essential Vocab.                | invention, iteration, prototype, electromagnet, magnet, sound (waves)                                                                                                                                                                     | speaker, empathy, pitch, criterion (pl.: criteria), constraints, vocal cords                                                                                                                                   | pickup [electrical]                                                                                                                                                                                                                     | <i>emphasize general words:</i> invention, iteration, prototype, constraints, criterion (pl. criteria)                                                                                                                                  | <i>emphasize general words:</i> invention, iteration, prototype, constraints, criterion (pl. criteria)               |       |
| Non-essential Vocab.            | engineering, modification, patent, PhD, frequency, polarity, resonance, tympanic membrane                                                                                                                                                 | bass [sound range], cone, spider, surround, AWG, neodymium magnet, larynx                                                                                                                                      | gauge, humbucker                                                                                                                                                                                                                        | <i>specific words for electronic musical instruments</i>                                                                                                                                                                                | <i>specific words for electronic musical instruments</i>                                                             |       |
