# Supplementary material for: Inventors emerging in-school and out-of-school: six iterations of educational design to promote equitable student engagement
Source: Frontiers journal article supplement (doi:10.3389/feduc.2024.1287521), 2024-02-13
Supplement: Data_Sheet_1.ZIP [file Data_Sheet_1.ZIP]

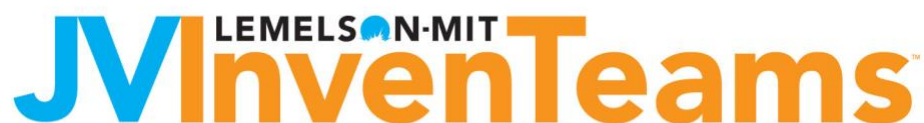

## Materials and Tools for U Control Invention Kit

This materials and tools list is sufficient for 20 students to complete the activities in teams of five students. This list can be used to purchase and/or supply materials and tools *without* purchasing the kit.

Materials and tools that are not supplied in the kit are listed separately and identified as *required* or *optional* to complete the activities.

All activities require safety items: safety glasses, disposable latex-free gloves, and dust masks.

| Materials and Tools<br>(required; supplied in the<br>purchased kit) | Size and Quantity                 | Notes                                  |
|---------------------------------------------------------------------|-----------------------------------|----------------------------------------|
| Shipping tape, clear                                                | 2 small rolls                     | Suggest rolls of 1.88 inch x 22.2 yard |
| Cardstock                                                           | 25 sheets of 8 1/2-inch X 11-inch | Suggest 110 lb. weight                 |
| 2-foot x 2-foot x 1-inch pink foam insulation                       | 10 pieces                         | <a href="#">Home Depot</a>             |
| 2-inch x 1 3/16-inch door middle hinges                             | 10                                | <a href="#">Home Depot</a>             |
| 2 1/2-inch L-brackets                                               | 20                                | <a href="#">Home Depot</a>             |
| Machine screws, 8-32 tpi, 1 1/2-inch, Phillips head                 | 200                               |                                        |
| Nuts, #8-32                                                         | 50                                |                                        |
| Flat washers (#8)                                                   | 30                                |                                        |

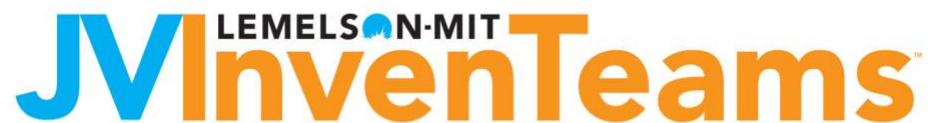

|                                                      |          |                          |
|------------------------------------------------------|----------|--------------------------|
| Precision screwdriver set                            | 5 sets   |                          |
| Duct tape                                            | 2 rolls  |                          |
| Painters tape                                        | 1 roll   |                          |
| Red hookup solid core wire, 22 AWG                   | 125 feet | <a href="#">SparkFun</a> |
| Black hookup solid core wire, 22 AWG                 | 125 feet | <a href="#">SparkFun</a> |
| 9V battery                                           | 5        |                          |
| 9V battery holder                                    | 5        |                          |
| AA battery                                           | 40       |                          |
| AA battery holder (holds 4 batteries)                | 10       |                          |
| Solderless breadboard, 400 tie-points, 4 power rails | 5        | <a href="#">Amazon</a>   |
| Jumper wire kit                                      | 5        | <a href="#">SparkFun</a> |
| SPDT switch (on-off-on toggle)                       | 5        | <a href="#">Amazon</a>   |

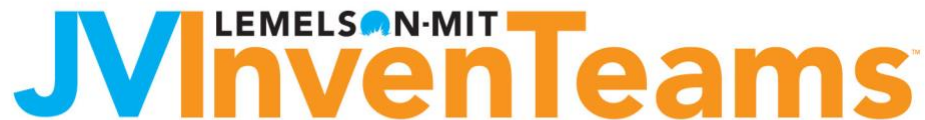

| H-bridge motor driver chip                                            | 5                                  | <a href="#">SparkFun</a>   |
|-----------------------------------------------------------------------|------------------------------------|----------------------------|
| Hot glue gun and glue sticks                                          | 5                                  |                            |
| Metal strap ties, 1 1/4-inch x 9-inch, 20 guage                       | 10                                 | <a href="#">Home Depot</a> |
| Servo motor, 4.8-7.2 volts                                            | 5                                  | <a href="#">Amazon</a>     |
| DC toy/hobby motor, 130 size                                          | 5                                  | <a href="#">Adafruit</a>   |
| Pliers, needle nose or jewelry                                        | 5 for class                        |                            |
| Wire cutter/stripper                                                  | 5 for class                        |                            |
| <b>Safety Items<br/>(required; supplied in the<br/>purchased kit)</b> | <b>Description</b>                 | <b>Notes</b>               |
| Latex-free disposable gloves                                          | 1 box of 100; medium               |                            |
| Safety glasses                                                        | 22 regular                         |                            |
| Safety glasses                                                        | 3 over prescription safety glasses |                            |
| Dust masks, disposable                                                |                                    |                            |



| Materials and Tools<br>(required; <i>not</i> supplied in<br>the purchased kit) | Size and Quantity            | Notes                                           |
|--------------------------------------------------------------------------------|------------------------------|-------------------------------------------------|
| Cardboard and scrap materials                                                  |                              | Commonly found in recycling bins                |
| Scissors, sharp                                                                | 1 pair for each class member |                                                 |
| Yardsticks                                                                     | 1 for each team              | Must include metric and U.S. standard notations |
| Utility knife                                                                  | 5 for class                  | For cutting cardboard                           |
| Calculators                                                                    | 1 for each team              | Can use calculators on smart phones             |
| Newspaper                                                                      | As needed                    | For keeping surfaces clean                      |
| Paper towels                                                                   | As needed                    | For cleaning-up water spills                    |
| Permanent markers                                                              | 5 for class                  |                                                 |
| Hammer                                                                         | 3 for class                  |                                                 |
| Phillips and flat head screwdriver set                                         | 5 sets                       |                                                 |

| Materials and Tools<br>(optional; <i>not</i> supplied in<br>the purchased kit) | Size and Quantity | Notes |
|--------------------------------------------------------------------------------|-------------------|-------|
| Soldering iron and lead-free solder                                            | 1 for class       |       |
