# Supplementary material for: Inventors emerging in-school and out-of-school: six iterations of educational design to promote equitable student engagement
Source: Frontiers journal article supplement (doi:10.3389/feduc.2024.1287521), 2024-02-13
Supplement: Data_Sheet_1.ZIP [file Data_Sheet_1.ZIP]

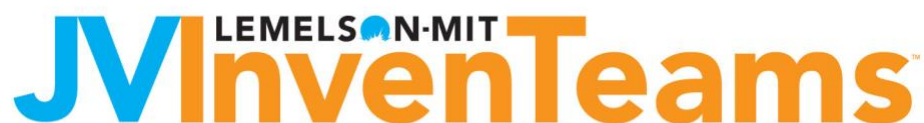

## Materials and Tools for Noise Makers Invention Kit

This materials and tools list is sufficient for 20 students to complete the activities in teams. The list can be used to purchase and/or supply tools and materials *without* purchasing the kit. Some suppliers are identified to aid in purchasing.

Materials and tools that are not supplied in the kit are listed separately and identified as *required* or *optional* to complete the activities.

All activities require safety items: safety glasses, disposable latex-free gloves, and disposable dust masks.

| Materials and Tools<br>(required; supplied in the<br>purchased kit) | Size and Quantity                                   | Notes                                    |
|---------------------------------------------------------------------|-----------------------------------------------------|------------------------------------------|
| Shipping tape, clear                                                | 2 small rolls                                       | Suggest rolls of 1.88 in. x 22.2 yd.     |
| Cardstock                                                           | 25 sheets of 8 ½" X 11"                             | Suggest 110 lb. weight                   |
| Rubber bands                                                        | 1 package of 50, size 64                            |                                          |
| Ear Buds                                                            | 5 total (1 side of ear bud<br>per pair of students) | Inexpensive; quality is not<br>important |
| D cell batteries                                                    | 10                                                  |                                          |
| Pink erasers                                                        | 10                                                  |                                          |
| Paper clips                                                         | 1 box, metal                                        |                                          |
| 32 AWG enameled magnet<br>wire, red                                 | Four 4-oz spools for the<br>class (1 lb. total)     | Amazon                                   |

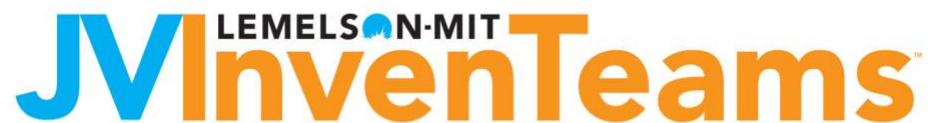

|                                   |                     |                     |
|-----------------------------------|---------------------|---------------------|
| 24 AWG enameled magnet wire (red) | One ½-lb spool      | Amazon              |
| 18 AWG enameled magnet wire       | One 1-lb spool      | Amazon              |
| Paper plates                      | 10, 9"              |                     |
| Styrofoam plates                  | 10, 9"              |                     |
| Mono jack, ¼"                     | 5                   |                     |
| Mono audio cable, 1/8"            | 5                   | Amazon              |
| ½" x 1/8" neodymium magnets       | 60                  |                     |
| Music wire; 0.032"                | 20 3-ft. lengths    |                     |
| Fishing line, monofilament        | 1 spool; 10 lb test | Amazon              |
| Tin boxes, small                  | 5                   | Like Altoids® boxes |
| Nails assortment                  |                     | ½" and 2"           |
| Nails                             | 10 3-in long        |                     |

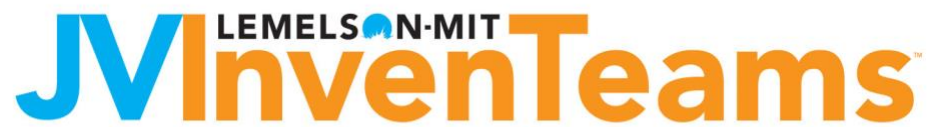

|                                     |           |          |
|-------------------------------------|-----------|----------|
| 220 grit sandpaper                  | 1 package |          |
| Masking tape                        | 1 roll    |          |
| Electrical tape                     | 1 roll    |          |
| iRig guitar adapter for iOS devices | 1         | Amazon   |
| Soldering iron                      | 2         | Sparkfun |
| Soldering iron stand                | 2         | Sparkfun |
| Lead-free solder                    | 2 spools  | Sparkfun |
| Tweezers                            | 5         |          |
| Wire stripper/cutter                | 1         |          |
| Tin snips                           | 4         |          |
| Alligator clip test leads           | 5         |          |
| Magnifying glass                    | 5         |          |

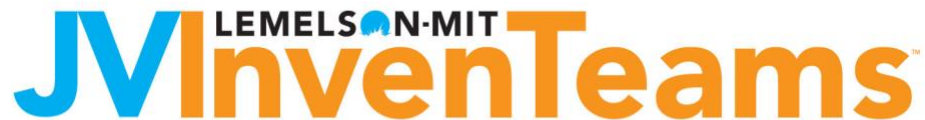

| Magnetic compass                                                      | 2                                  |              |
|-----------------------------------------------------------------------|------------------------------------|--------------|
| Hot glue gun and glue                                                 | 4                                  |              |
| <b>Safety Items<br/>(required; supplied in the<br/>purchased kit)</b> | <b>Description</b>                 | <b>Notes</b> |
| Latex-free disposable gloves                                          | 1 box of 100; medium               |              |
| Safety glasses                                                        | 22 regular                         |              |
| Safety glasses                                                        | 3 over prescription safety glasses |              |
| Dust masks; disposable                                                | 1 box                              |              |

| <b>Materials and Tools<br/>(required; <i>not</i> supplied in<br/>the purchased kit)</b> | <b>Size and Quantity</b>     | <b>Notes</b>                                                                                        |
|-----------------------------------------------------------------------------------------|------------------------------|-----------------------------------------------------------------------------------------------------|
| Cardboard and scrap materials                                                           |                              | Commonly found in recycling bins; can be used for making instruments and for prototyping inventions |
| Scissors                                                                                | 1 pair for each class member |                                                                                                     |
| Rulers                                                                                  | 1 for each class member      |                                                                                                     |
| Hammers                                                                                 | 4                            | Hammers help with ear bud take-apart & in building musical instruments                              |

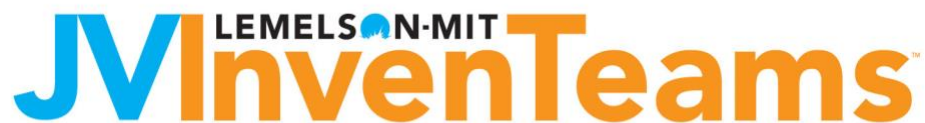

|                  |   |                                                 |
|------------------|---|-------------------------------------------------|
| Screwdriver sets | 4 | Small screwdrivers help with ear bud take-apart |
|------------------|---|-------------------------------------------------|

| Materials and Tools<br>(optional; <i>not</i> supplied in<br>the purchased kit) | Size and Quantity                    | Notes                                                                       |
|--------------------------------------------------------------------------------|--------------------------------------|-----------------------------------------------------------------------------|
| Utility knives                                                                 | 5 for class                          | For cutting cardboard                                                       |
| Hand saw                                                                       | 4                                    | Hand saws, if appropriate for the materials selected, may be helpful        |
| “C” clamps                                                                     | 8                                    | Clamps are helpful for holding wood and piping while cutting with hand saws |
| Needle nose pliers                                                             | 4                                    | Pliers may help with ear bud take-apart                                     |
| PVC piping                                                                     | 1 bag of various lengths & diameters | For making instruments                                                      |
| Flexible tubing                                                                |                                      | For making instruments; Inner and outer diameter is not important           |
| Wood                                                                           | Various lengths and thicknesses      | For making instruments                                                      |
