# Supplementary material for: Inventors emerging in-school and out-of-school: six iterations of educational design to promote equitable student engagement
Source: Frontiers journal article supplement (doi:10.3389/feduc.2024.1287521), 2024-02-13
Supplement: Data_Sheet_1.ZIP [file Data_Sheet_1.ZIP]

## 2017 FVC Schedule

| KEY: white = general, minds-on light gray = general, hands-on medium-gray = topical, minds-on dark-gray = topical, hands-on |                                                                                                                                                                  |                                                                                                                                                                                                                        |                                                                                                                                                                                                                             |                                                                                                                                                                                                                                                                     |                                                                                                                                   |
|-----------------------------------------------------------------------------------------------------------------------------|------------------------------------------------------------------------------------------------------------------------------------------------------------------|------------------------------------------------------------------------------------------------------------------------------------------------------------------------------------------------------------------------|-----------------------------------------------------------------------------------------------------------------------------------------------------------------------------------------------------------------------------|---------------------------------------------------------------------------------------------------------------------------------------------------------------------------------------------------------------------------------------------------------------------|-----------------------------------------------------------------------------------------------------------------------------------|
|                                                                                                                             | Monday, Feb. 20                                                                                                                                                  | Tuesday, Feb. 21                                                                                                                                                                                                       | Wednesday, Feb. 22                                                                                                                                                                                                          | Thursday, Feb. 23                                                                                                                                                                                                                                                   | Friday, Feb. 24                                                                                                                   |
| 9:00-9:30 AM                                                                                                                | Invention problem strip activity (e, p.2)                                                                                                                        | Safety First! (e, p. 10)<br>Rules posted.<br>Keep yourself safe.<br>Keep others safe.<br>Keep workspace clutterfree.                                                                                                   | Cast a clay model.                                                                                                                                                                                                          | Mold the shoe sole prototype.                                                                                                                                                                                                                                       | Test the prototype.                                                                                                               |
| 9:30-10:00 AM                                                                                                               | Introductions & "What's your favorite invention?"<br>Student-defined "invention."<br>Introduce week's activities.                                                | Biomechanics and movement. (e, s p. 10-12)<br>Why is this biomechanics important to shoe soles?                                                                                                                        |                                                                                                                                                                                                                             |                                                                                                                                                                                                                                                                     |                                                                                                                                   |
| 10:00-10:30 AM                                                                                                              | Safety first! (e, p. 10)<br>Rules posted.<br>Keep yourself safe.<br>Keep others safe.<br>Keep workspace clutterfree.                                             | What is biomimicry? (long video, show 5-10 min)                                                                                                                                                                        |                                                                                                                                                                                                                             |                                                                                                                                                                                                                                                                     |                                                                                                                                   |
| 10:30-10:40 AM                                                                                                              | Break                                                                                                                                                            | Break                                                                                                                                                                                                                  | Break                                                                                                                                                                                                                       | Break                                                                                                                                                                                                                                                               | Break                                                                                                                             |
| 10:40-11:00 AM                                                                                                              | Handout guides.<br>Inventing has its own special language (WORD WALL).<br>Inventing is a cycle, and uses SCAMPER (P8-P9).<br>Reflect on problem strips.          | Basic shoe terms. (Handout)<br>Can you find all of these parts on your shoe?<br>Individual research on shoe sole designs. (e, s p. 15-20)<br>Examine your own shoe. (e, s p. 13)                                       | Introduce Scott Portzline, Inventor<br>Advice from Scott: Be creative, Be passionate, Be curious, Be flexible<br>Scott sent 3-D printed shoe soles! (p. 35)                                                                 | Explore team members' good problems.<br>Who would benefit from a solution and how?<br>Pick top 3-5 problems by clumping similar problems and discarding problems that may be less beneficial.<br>Are there certain problems that students are really interested in? | Prepare for showcase of prototypes and invention worksheets                                                                       |
| 11:00-11:30 AM                                                                                                              | What's an invention?<br>Who's an inventor? (p. P9)<br>Inventing takes skills and knowledge - a team sport!<br>There are 4 types of people on invention teams.    | What kind of shoe sole do you want to invent?<br>How will it be useful?<br>How will it be unique?<br>START sketching designs in guidebooks.                                                                            | Introduce Dr. Sokolowski, Inventor                                                                                                                                                                                          |                                                                                                                                                                                                                                                                     |                                                                                                                                   |
| 11:30 AM-Noon                                                                                                               | Lunch                                                                                                                                                            | Lunch                                                                                                                                                                                                                  | Lunch                                                                                                                                                                                                                       | Lunch                                                                                                                                                                                                                                                               | Lunch                                                                                                                             |
| Noon-12:30 PM                                                                                                               | Tinker Hatfield, Inventor                                                                                                                                        | Describe "scale". CONTINUE to sketch designs and draw several to scale. (e, s p. 21-24)                                                                                                                                | SKYPE with Dr. Sokolowski 15-20 minutes + 10 minutes of Q&A                                                                                                                                                                 | Rank problems based on students' interest in a possible solution. Focus on the beneficiary. Research possible solutions. Brainstorm & sketch solutions for top 3-5 problems. SCAMPER (p. 43-44)<br>Choose ONE problem.                                              | Showcase of Winter Camp with special guests (LMIT, BC, Clarks, parents); Balloon Challenge to end the showcase w/ visitors - FUN! |
| 12:30-1:00 PM                                                                                                               | Design a cell phone stand. (e, p. 2-3, s, p. 3)<br>Draw first.<br>Reintroduce SCAMPER for considering design options.<br>Make your stand.                        | Select one design that you want to sculpt in clay and present to team for consideration of molding and casting a prototype of it.                                                                                      | Scott Portzline & Susan Sokolowski<br>Students individually brainstorm how Scott and Susan are different and alike. Discuss in teams.                                                                                       |                                                                                                                                                                                                                                                                     |                                                                                                                                   |
| 1:00-1:30 PM                                                                                                                | Think about your stand. Share your design / process.<br>Did you get someone else's opinion?<br>What would you do the same or differently?                        | Students individually sculpt clay models (seated as teams) (e, s, p. 25-26)                                                                                                                                            | Purposeful & Unique Inventions: Introduce empathy.<br>What does empathy have to do with invention? (p. 36-38)<br>Are you empathetic? (5 question hand-out)                                                                  | Select 1 Problem and draw multiple solutions; use readily available materials to make models (grab bag inventing, recycle bin)                                                                                                                                      |                                                                                                                                   |
| 1:30-2:00 PM                                                                                                                | Introduce Invention as a cycle to solve a problem to make someone's life easier, healthier, more engaging [Kid President]                                        |                                                                                                                                                                                                                        | David Sengeh, Inventor (TED talk)                                                                                                                                                                                           | MIT Class 2.009<br>How Orange became Orange (Video)                                                                                                                                                                                                                 |                                                                                                                                   |
| 2:00-2:30 PM                                                                                                                | Inventing is a team sport.<br>Four Corners-Teams selected for the week (p.7)                                                                                     |                                                                                                                                                                                                                        | Invention Worksheet for David Sengeh<br>work in pairs; discuss in teams                                                                                                                                                     | Complete Invention Worksheet for one problem.<br>Continue to research and draw possible solutions.                                                                                                                                                                  | Reflection and feedback                                                                                                           |
| 2:30-3:00 PM                                                                                                                | Summarize the day, go over key terms, set the stage for tomorrow by introducing biomechanics and biomimicry.<br>We'll sit with our teams tomorrow.<br>Exit Slips | In teams, each student describes the purpose / intended use of their sole and shows their clay model. As a team, 1 clay model is selected to be molded tomorrow. Teams can vote on which they will mold.<br>Exit Slips | Students collect 10 good problems to solve (now & HW)<br>Say, "Look around your home, ask family and friends, and be empathetic."<br>Students should practice saying, "What's your problem? I'm an inventor."<br>Exit Slips | Teams present Invention Worksheet.<br>Besides their shoe sole, students will create a table display of their Invention Worksheet and drawings for tomorrow's showcase.<br>Exit Slips                                                                                | Presentation of certificates to all inventors!<br>Exit Slips                                                                      |
