# Supplementary material for: Inventors emerging in-school and out-of-school: six iterations of educational design to promote equitable student engagement
Source: Frontiers journal article supplement (doi:10.3389/feduc.2024.1287521), 2024-02-13
Supplement: Data_Sheet_1.ZIP [file Data_Sheet_1.ZIP]

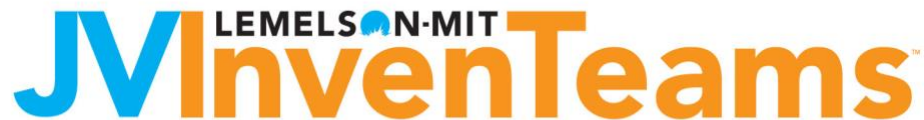

### Materials and Tools for Shoe Soles Invention Kit

This materials and tools list is sufficient for 20 students to complete the activities in teams. The list can be used to purchase and/or supply tools and materials *without* purchasing the kit. Some suppliers are identified to aid in purchasing.

Materials and tools that are not supplied in the kit are listed separately and identified as *required* or *optional* to complete the activities.

All activities require safety items: safety glasses, disposable latex-free gloves, and disposable dust masks.

| Materials and Tools<br>(required; supplied in the<br>purchased kit) | Size and Quantity                        | Notes                                             |
|---------------------------------------------------------------------|------------------------------------------|---------------------------------------------------|
| Shipping tape, clear                                                | 2 small rolls                            | Suggest rolls of 1.88 in. x 22.2 yd.              |
| Cardstock                                                           | 25 sheets of 8 ½" X 11"                  | Suggest 110 lb. weight                            |
| VytaFlex® 30                                                        | 6 trial size containers<br>(2 lbs. each) | Reynolds Advanced<br>Materials; do not substitute |
| Universal Mold Release                                              | 1 can; 12 oz.                            | Reynolds Advanced<br>Materials; do not substitute |
| So-Strong® Color Tint,<br>color sampler                             | Samples provide in kit                   | Reynolds Advanced<br>Materials; do not substitute |
| Soft modeling clay                                                  | 20 1-lb. bars                            | Sulphur-free                                      |
| Clay sculpting tools                                                | 5 sets                                   |                                                   |

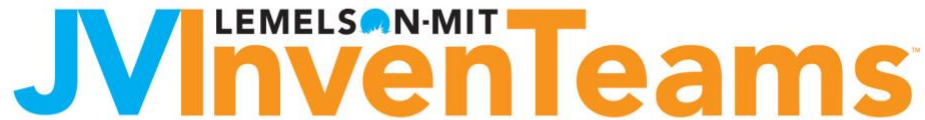

|                                                               |                                    |                                                            |
|---------------------------------------------------------------|------------------------------------|------------------------------------------------------------|
| Clear deli containers for mixing                              | 25 16-oz. containers               |                                                            |
| Measuring container                                           | 1 16-oz. container                 | Can substitute with a measuring cup with ounce graduations |
| Glue                                                          | 1 tube                             |                                                            |
| Roll-on stamp pad ink                                         | 1 pad                              |                                                            |
| Jumbo wooden craft sticks                                     | 1 bag of 50                        | Can substitute with paint stirrers                         |
| Heavy duty aluminum foil                                      | 1 roll                             |                                                            |
| Paper                                                         | 18" wide roll                      | Like butcher or parchment paper                            |
| <b>Safety Items (required; supplied in the purchased kit)</b> | <b>Description</b>                 | <b>Notes</b>                                               |
| Latex-free disposable gloves                                  | 1 box of 100; medium               |                                                            |
| Safety glasses                                                | 22 regular                         |                                                            |
| Safety glasses                                                | 3 over prescription safety glasses |                                                            |
| Dust masks, disposable                                        | 1 box                              |                                                            |

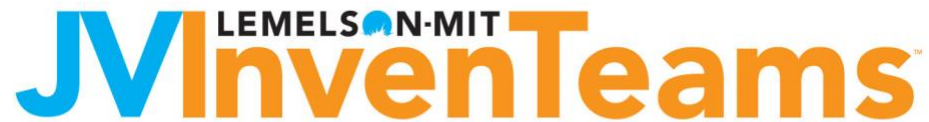

| Materials and Tools<br>(required; <i>not</i> supplied in<br>the purchased kit) | Size and Quantity               | Notes                               |
|--------------------------------------------------------------------------------|---------------------------------|-------------------------------------|
| Cardboard and scrap<br>materials                                               |                                 | Commonly found in<br>recycling bins |
| Scissors                                                                       | 1 pair for each class<br>member |                                     |
| Rulers                                                                         | 1 for each class member         |                                     |
| Shoe box size boxes or<br>copy paper tops                                      | 5                               | Check school supply room            |

| Materials and Tools<br>(optional; <i>not</i> supplied in<br>the purchased kit) | Size and Quantity | Notes                 |
|--------------------------------------------------------------------------------|-------------------|-----------------------|
| Utility knives                                                                 | 5 for class       | For cutting cardboard |
