# Supplementary material for: Inventors emerging in-school and out-of-school: six iterations of educational design to promote equitable student engagement
Source: Frontiers journal article supplement (doi:10.3389/feduc.2024.1287521), 2024-02-13
Supplement: Data_Sheet_1.ZIP [file Data_Sheet_1.ZIP]

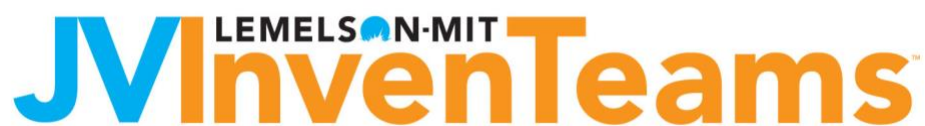

## Materials and Tools for Chill Out Invention Kit

This materials and tools list is sufficient for 20 students to complete the activities in teams of five students. This list can be used to purchase and/or supply materials and tools *without* purchasing the kit.

Materials and tools that are not supplied in the kit are listed separately and identified as *required* or *optional* to complete the activities.

All activities require safety items: safety glasses, disposable latex-free gloves, and dust masks.

| Materials and Tools<br>(required; supplied in the<br>purchased kit) | Size and Quantity                 | Notes                                        |
|---------------------------------------------------------------------|-----------------------------------|----------------------------------------------|
| Shipping tape, clear                                                | 2 small rolls                     | Suggest rolls of 1.88 inch x 22.2 yard       |
| Cardstock                                                           | 25 sheets of 8 1/2-inch x 11-inch | Suggest 110 lb. weight                       |
| Aluminum foil                                                       | 1 roll                            |                                              |
| Metal lunchbox                                                      | 2                                 |                                              |
| Nylon-insulated lunch bag                                           | 2                                 |                                              |
| Neoprene lunch bag or beverage cooler                               | 2                                 |                                              |
| Glass measuring cups                                                | 2, 4-cup capacity                 | Need to hold 2 1/2 cups of liquid            |
| Funnel                                                              | 1                                 | For transfer of hot liquid to narrow bottles |
| Electric tea kettle                                                 | 1                                 | Boiling water needed                         |

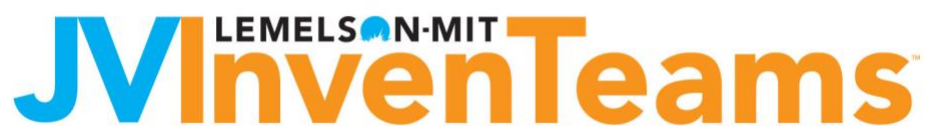

|                                 |                                |                      |
|---------------------------------|--------------------------------|----------------------|
| Clear plastic bottles with caps | 20, 2 oz. bottles              |                      |
| Clear plastic storage bin       | 4, 6 quart                     | Shoe box size        |
| Insulated or Styrofoam cup      | 4, 16 oz.                      |                      |
| Reclosable plastic bags         | 20, 1 gallon-size              |                      |
| Food coloring                   | 4 bottles, 1 fluid ounce total | Two different colors |
| Vegetable shortening            | 4, 16-ounce cans               | Store brand          |
| Styrofoam packing peanuts       | 1 bag                          |                      |
| Feathers                        | 1 bag of approximately 500     |                      |
| Felt squares                    | 50 pieces, 9-inch x 12-inch    |                      |
| Plastic wrap                    | 1 roll                         |                      |
| Wax paper                       | 1 roll                         |                      |
| Masking tape                    | 5 rolls                        |                      |
| Plastic or paper plates         | 1 package of 25                |                      |

|                                   |                              |                                 |
|-----------------------------------|------------------------------|---------------------------------|
| String                            | 1 roll                       |                                 |
| Spray bottle                      | 5                            |                                 |
| AA battery holder with wire leads | 5, 4 battery capacity        |                                 |
| AA batteries                      | 20                           |                                 |
| D battery holder                  | 5, 4 battery capacity        |                                 |
| D batteries                       | 20                           |                                 |
| Peltier tile                      | 5                            |                                 |
| Masonite board                    | 5, 16 x 20-inch              |                                 |
| Cardboard                         | 10 sheets, 20-inch x 20-inch |                                 |
| Arctic alpine plus 11 CPU fan     | 10                           | <a href="#">Newegg</a>          |
| Glass immersion thermometer       | 10                           | Record in degree C and degree F |
| Infrared thermometer              | 2                            |                                 |
| Indoor/outdoor thermometer        | 5, 8-inch                    |                                 |

| Wire cutter/stripper                                                  | 5 for class                        |              |
|-----------------------------------------------------------------------|------------------------------------|--------------|
| <b>Safety Items<br/>(required; supplied in the<br/>purchased kit)</b> | <b>Description</b>                 | <b>Notes</b> |
| Latex-free disposable gloves                                          | 1 box of 100; medium               |              |
| Safety glasses                                                        | 22 regular                         |              |
| Safety glasses                                                        | 3 over prescription safety glasses |              |
| Dust masks, disposable                                                |                                    |              |

| <b>Materials and Tools<br/>(required; <i>not</i> supplied in<br/>the purchased kit)</b> | <b>Size and Quantity</b>     | <b>Notes</b>                     |
|-----------------------------------------------------------------------------------------|------------------------------|----------------------------------|
| Cardboard and scrap materials                                                           |                              | Commonly found in recycling bins |
| Scissors, sharp                                                                         | 1 pair for each class member | From classroom                   |
| Utility knife                                                                           | 5 for class                  | For cutting cardboard            |
| Ruler                                                                                   | 5 for class                  | From classroom                   |
| Gooseneck lamp with incandescent light bulb                                             | 1 for class                  | From school                      |



|                            |                 |                                         |
|----------------------------|-----------------|-----------------------------------------|
| Chocolate bar              | 1 for class     | Vending machine or grocery store        |
| Calculator                 | 1 for each team | From classroom                          |
| Paper towel                | 1 roll          | From school bathroom                    |
| Paper or newsprint         | 1 stack         | From classroom                          |
| Plastic spoon              | 10              | Check school cafeteria                  |
| Flattened cardboard        | 1 piece         | Size of cereal box                      |
| Empty soda can             | 4, 7.5-oz.      | From recycling bin                      |
| Empty plastic water bottle | 10, 16-oz.      | From recycling bin                      |
| Ice                        | 2 bags          | Grocery store                           |
| Scrap 20-gauge wire        | 1 spool         | For students to practice stripping wire |

| Materials and Tools<br>(optional ; <i>not</i> supplied<br>in the purchased kit) | Size and Quantity | Notes              |
|---------------------------------------------------------------------------------|-------------------|--------------------|
| Scrap cloth                                                                     | 10 pieces         | Size of dish towel |
| Terra cotta pot                                                                 | 1, 20 inch        | Clay, not plastic  |

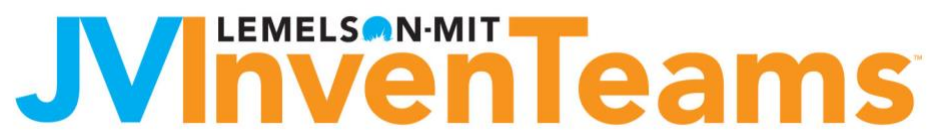

|                         |            |                                               |
|-------------------------|------------|-----------------------------------------------|
| Terra cotta pot         | 1, 12 inch | Clay, not plastic                             |
| Playground sand         | 1 bag      |                                               |
| Light-colored wet cloth | 1          | Must cover the width of a 20 in. diameter pot |
| Duct tape               | 1 roll     |                                               |
| Alligator clamps        | 5          |                                               |
