# Supplementary material for: Inventors emerging in-school and out-of-school: six iterations of educational design to promote equitable student engagement
Source: Frontiers journal article supplement (doi:10.3389/feduc.2024.1287521), 2024-02-13
Supplement: Data_Sheet_1.ZIP [file Data_Sheet_1.ZIP]

(used with permission from Authors, 2021)

**TABLE 1** Chill Out! curriculum (50-minute class per day).

| Module                                          | Brief descriptions of some activities                                                                                                                                                                                                                                                                                                                                                                                                                                                                                                                                                                  |
|-------------------------------------------------|--------------------------------------------------------------------------------------------------------------------------------------------------------------------------------------------------------------------------------------------------------------------------------------------------------------------------------------------------------------------------------------------------------------------------------------------------------------------------------------------------------------------------------------------------------------------------------------------------------|
| 1. Invention<br>[Days 1–2]                      | <p>Invention warm-up activity, Digital Device Stand Design Challenge, gallery walk; evaluate whether the stands can help users with various needs</p> <p>Introduce invention and the invention problem and brainstorm users whose needs are not met with standard lunch box</p> <p>Choose users for the lunch box invention</p> <p>HomeFun activity: Share inventions from your original areas</p> <p>Form invention teams (groups of three) where the team members have diverse expertise, model how to work in teams</p> <p>Ask students to bring shoe boxes to school for the invention project</p> |
| 2. Thermal energy transfer<br>[Days 3–6]        | <p>Hands-on science labs and demonstrations that teach thermal energy and different types of heat transfer, e.g., the demonstration about convection as in Figure 1</p> <p>Discuss problems and solutions related to thermal energy transfer in the context of food safety and transportation</p> <p>Explore the design and materials of containers to keep food/drink cold in everyday life</p>                                                                                                                                                                                                       |
| 3. Thermal conductivity of materials [Days 7–9] | <p>Shortening Mitten lab to teach insulation and conduction</p> <p>Watch a video and discuss how Emperor penguins minimize the amount of heat loss to cool ocean water</p> <p>HomeFun activity: share traditional clothing that keep warm or cool in students' original regions, areas, and cultures.</p> <p>Thermal Resistance Efficiency lab to explore the thermal properties of various materials</p>                                                                                                                                                                                              |
| 4. Lunch box prototyping<br>[Days 10–11]        | <p>Design, build, test, and revise a lunch box using shoe boxes that will keep cold food from warming up</p>                                                                                                                                                                                                                                                                                                                                                                                                                                                                                           |
| 5. Peltier brainstorming<br>[Days 12–13]        | <p>Learn about heat island, thermoelectric effect, removing heat from the system, and Peltier tiles</p> <p>Build a Peltier cooling unit that is made of a Peltier tile sandwiched between two heat sink fans</p> <p>Brainstorm ways to use Peltier tiles in lunch boxes</p>                                                                                                                                                                                                                                                                                                                            |
| 6. Poster for Patent Application [Days 14–15]   | <p>Learn about what is patent and patent application</p> <p>Create a poster that includes elements of patent application for lunch box inventions</p> <p>Extend the invention experience to other everyday examples</p>                                                                                                                                                                                                                                                                                                                                                                                |
