# Supplementary material for: Inventors emerging in-school and out-of-school: six iterations of educational design to promote equitable student engagement
Source: Frontiers journal article supplement (doi:10.3389/feduc.2024.1287521), 2024-02-13
Supplement: Data_Sheet_1.ZIP [file Data_Sheet_1.ZIP]

| 2019 FVC Schedule -- FINAL v7 20190216 |                                                                                                                                                                                                                                                |                                                                                                                                                                                                                    |                                                                                                                                                                                                                                                     |                                                                                                                                                                                                                                                     |                                                                                                                 | Notes |
|----------------------------------------|------------------------------------------------------------------------------------------------------------------------------------------------------------------------------------------------------------------------------------------------|--------------------------------------------------------------------------------------------------------------------------------------------------------------------------------------------------------------------|-----------------------------------------------------------------------------------------------------------------------------------------------------------------------------------------------------------------------------------------------------|-----------------------------------------------------------------------------------------------------------------------------------------------------------------------------------------------------------------------------------------------------|-----------------------------------------------------------------------------------------------------------------|-------|
| white = general, minds-on              | gray = general, hands-on                                                                                                                                                                                                                       | yellow = topical, minds-on                                                                                                                                                                                         | orange = topical, hands-on                                                                                                                                                                                                                          | light-blue = independent, minds-on                                                                                                                                                                                                                  | medium-blue = independent, hands-on                                                                             |       |
|                                        | Monday, Feb. 18                                                                                                                                                                                                                                | Tuesday, Feb. 19                                                                                                                                                                                                   | Wednesday, Feb. 20                                                                                                                                                                                                                                  | Thursday, Feb. 21                                                                                                                                                                                                                                   | Friday, Feb. 22                                                                                                 |       |
| 9:00-9:30 AM                           | <u>Dr. Z.</u> : Invention problem strip activity [P19]                                                                                                                                                                                         | <u>Mr. K.</u> : Review safety practices.                                                                                                                                                                           | <u>Mr. K.</u> : Review invention & safety practices.                                                                                                                                                                                                | <u>Mr. K.</u> : Review invention & safety practices. / <u>Sci. Lit.</u> : Procedure writing                                                                                                                                                         | <u>Mr. K.</u> : Review invention & safety practices / <u>Sci. Lit.</u> : Lesson on brochures                    |       |
| 9:30-10:00 AM                          | <u>Mr. J.</u> : Introductions & "What's your fave invention?"<br>Student-defined "invention." --> <b>synthesize to "useful &amp; unique"</b><br>Hand-out guides & introduce the week's activities [P13]                                        | <u>Mr. J.</u> : Inventing is a team sport. Four Corners to aid in team selection [7]                                                                                                                               | <u>Mr. J.</u> : Build a Circuit to Control a Motor [53-60]                                                                                                                                                                                          | <u>Mr. K.</u> : "Meet Eben Bayer" [69] or some different inventor?                                                                                                                                                                                  | <u>Mr. J.</u> : Invention Challenge: Make second prototype [ITERATION C2]                                       |       |
| 10:00-10:30 AM                         | <u>Mr. K.</u> : Safety first! [9-10]<br>Keep yourself safe.<br>Keep others safe.<br>Keep workspace clutterfree.<br>[Errors WS; preview tools]                                                                                                  | <u>Mr. J.</u> : Construct a Door: Intro & Step 1 [24-25]                                                                                                                                                           |                                                                                                                                                                                                                                                     | <u>Mr. M.</u> : Lead work-time for finalizing/tweaking <b>first</b> prototypes                                                                                                                                                                      | <u>Mr. J.</u> : Peer-review of Invention Challenges [ITERATION C2]                                              |       |
| 10:30-10:40 AM                         | Break                                                                                                                                                                                                                                          | Break                                                                                                                                                                                                              | Break                                                                                                                                                                                                                                               | Break                                                                                                                                                                                                                                               | Break                                                                                                           |       |
| 10:40-11:00 AM                         | <u>Dr. Z.</u> : Design cell phone stands. [2-3]: Draw, then make!                                                                                                                                                                              | <u>Mr. K.</u> : Construct a Door, Steps 2-5 [27-33]                                                                                                                                                                | <u>Mr. M.</u> : Simple Machines: The Lever [62-63]                                                                                                                                                                                                  | <u>Mr. J.</u> : Peer-review of doors ITERATION "D1"                                                                                                                                                                                                 | ALL: Prepare for showcase: Revise brochures, finalize prototypes, complete Invention Worksheets, film videos    |       |
| 11:00-11:30 AM                         | <u>Dr. Z.</u> : Think about your stand. Share design / process.<br>Did you get someone else's opinion? What would you do the same or differently?                                                                                              |                                                                                                                                                                                                                    | <u>Mr. K.</u> : Build a Mechanical Door Opener [64-67]                                                                                                                                                                                              | <u>Mr. J.</u> : Lead work-time for finalizing/tweaking <b>second</b> prototypes                                                                                                                                                                     |                                                                                                                 |       |
| 11:30 AM-Noon                          | <u>Mr. J.</u> : Intro to Machines [10-11] & Simple Machines video/s [11]                                                                                                                                                                       | <u>Mr. J.</u> : The Science of Motors [35-38]                                                                                                                                                                      |                                                                                                                                                                                                                                                     | AH: Skype with inventor                                                                                                                                                                                                                             |                                                                                                                 |       |
| Noon-12:30 PM                          | Lunch                                                                                                                                                                                                                                          | Lunch                                                                                                                                                                                                              | Lunch                                                                                                                                                                                                                                               | Lunch                                                                                                                                                                                                                                               | Working lunch                                                                                                   |       |
| 12:30-1:00 PM                          | <u>Mr. K.</u> : Six Simple Machines [11-15]; Kahoot; practice with tools                                                                                                                                                                       | <u>Mr. M.</u> : Investigate motors [39-40]                                                                                                                                                                         | <u>Ms. M.</u> : Intro to Invention Chall. [71-73] ( <i>curious, empathetic leaders</i> )                                                                                                                                                            | <u>Mr. J.</u> : Invention Challenge: Make first prototype [ITERATION C1]                                                                                                                                                                            | Mr. J.: Showcase of Winter Camp with special guests (LMIT, BC, Clarks, parents)<br>Presentation of certificates |       |
| 1:00-1:30 PM                           | <u>Mr. J.</u> : Investigate Mechanical Door Openers [16-19]                                                                                                                                                                                    | <u>Mr. J.</u> : Build a Simple Circuit [46-48]                                                                                                                                                                     | <u>Ms. M.</u> : Explore team members' 10 ideas each (30-40 per group); Pick top 3-5 problems by clumping similar problems and discarding problems that may be less beneficial.                                                                      |                                                                                                                                                                                                                                                     |                                                                                                                 |       |
| 1:30-2:00 PM                           | <u>Mr. M.</u> : Identify Users and Their Needs [19-20]                                                                                                                                                                                         | <u>Mr. J.</u> : Controlling the Motion of a Motor [49-52]                                                                                                                                                          | <u>Ms. M.</u> : Select 1 Problem & draw multiple solutions; use readily available materials to make models (grab bag inventing, cardboard, recycle bin); <b>SCAMPER</b> [74-75]                                                                     | <u>Mr. J.</u> : Peer-review of Invention Challenges [ITERATION C1]                                                                                                                                                                                  |                                                                                                                 |       |
| 2:00-2:30 PM                           | <i>General overflow time / If time allows, Mr. J.: Types of Team Members</i>                                                                                                                                                                   | <u>AB &amp; MA</u> Introduce empathy. How does empathy relate to invention? How are you empathetic?                                                                                                                | <u>Ms. M.</u> : Complete Invention Worksheet for one problem. Continue to research and draw possible solutions. [54,58]                                                                                                                             | RG Skype with _____                                                                                                                                                                                                                                 | <b>DK+SK</b> : Reflection and feedback                                                                          |       |
| 2:30-3:00 PM                           | <u>Mr. J.</u> : Summarize the day, go over key terms, preview tomorrow, <b>then assign "10 ideas" HW (be curious to brainstorm about doors/lids/openings);</b> ask, "What'd you do today?"<br>Complete Exit Slips (self-assessment + mini-CER) | <u>Mr. J.</u> : Summarize the day, go over key terms, preview tomorrow, <b>re-frame "10 ideas" HW. (be empathetic to brainstorm about doors/lids/openings);</b> ask, "What'd you do today?"<br>Complete Exit Slips | <u>Mr. J.</u> : Summarize the day, go over key terms, preview tomorrow, <b>emphasize "one idea" *and* door / lid / opening as HW (discuss them with family/friends, and/or bring materials);</b> ask, "What'd you do today?"<br>Complete Exit Slips | <u>Mr. J.</u> : Summarize the day, go over key terms, preview tomorrow, <b>emphasize "one idea" *and* door / lid / opening as HW (discuss them with family/friends, and/or bring materials);</b> ask, "What'd you do today?"<br>Complete Exit Slips | <b>DK+SK</b> : Exit Slips Interviews                                                                            |       |
| Extra material                         | Types of Team Members [7]                                                                                                                                                                                                                      | CAD Drawings [21-22]; Motor Spec Sheets [41-44]                                                                                                                                                                    |                                                                                                                                                                                                                                                     |                                                                                                                                                                                                                                                     |                                                                                                                 |       |
| Essential Vocab.                       | invention, iteration, prototype, force, inclined plane, lever, machine, motor, pulley, screw, system, torque, wedge, wheel-and-axle, work                                                                                                      | actuator, empathy, foam insulation board, load, motor, nut, resistance, screw (n) [x2], torque, voltage, washer                                                                                                    | lever                                                                                                                                                                                                                                               | <see Mon.-Wed.>                                                                                                                                                                                                                                     | <see Mon.-Wed.>                                                                                                 |       |
| Non-essential Vocab.                   | engineering, modification, patent, PhD                                                                                                                                                                                                         | hydraulics, Lorentz force, magnetic field, Millinewton meters (mN*m), nominal voltage, Ohm's Law, pilot hole, revolutions per minute, rotor, stator, velocity                                                      | input effort, mount, output effort, pitch, production sample, proof of concept, working prototype                                                                                                                                                   | N/A                                                                                                                                                                                                                                                 | N/A                                                                                                             |       |
